# Supplementary material for: IL-17-producing γδ T cells switch migratory patterns between resting and activated states
Source: PubMed Central journal article supplement (PMC5465362; doi:10.1038/ncomms15632), 2017-06-05
Supplement: ncomms15632-s1.pdf [file ncomms15632-s1.pdf]

## SUPPLEMENTARY INFORMATION

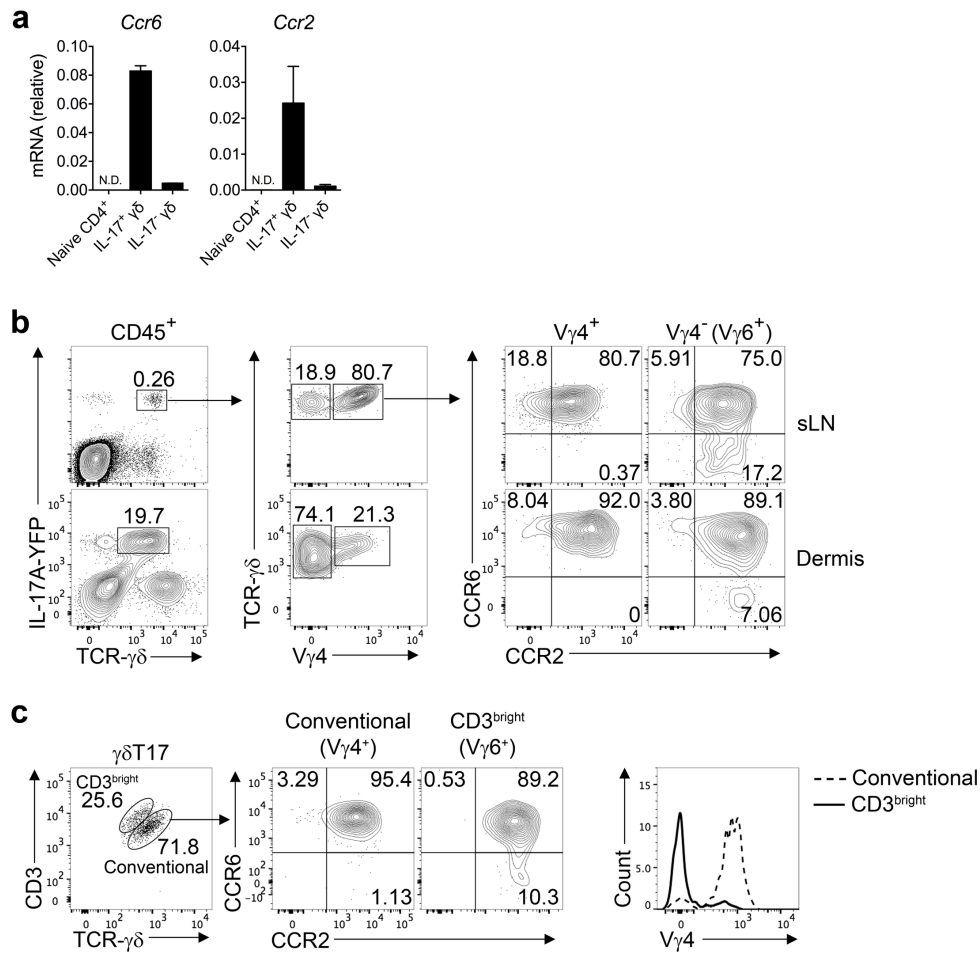

**Supplementary Figure 1: CCR6 and CCR2 expression by resting  $\gamma\delta$ T17 cells.** **a)** *Ccr6* and *Ccr2* mRNA in sorted CD3<sup>+</sup>CD4<sup>+</sup>CD44<sup>lo</sup>CD25<sup>-</sup> naïve CD4 T cells and CD90<sup>+</sup>CD3<sup>+</sup>TCR- $\gamma\delta$ <sup>+</sup>IL-17A-YFP<sup>+</sup>  $\gamma\delta$ T17 and YFP<sup>-</sup> IL-17<sup>-</sup>  $\gamma\delta$  T cells from skin-draining lymph nodes (sLNs) and spleen of naïve *Il17a*<sup>Cre</sup> $\times$ *Rosa26*<sup>eYFP</sup> mice (pooled from n=5). N.D.: not detected. **b)** Representative flow cytometry of CCR6/CCR2 expression by V $\gamma$ 4<sup>+</sup> and V $\gamma$ 4<sup>-</sup> (V $\gamma$ 6<sup>+</sup>)  $\gamma\delta$ T17 cells from sLNs and dermis of naïve *Il17a*<sup>Cre</sup> $\times$ *Rosa26*<sup>eYFP</sup> mice (n=3). **c)** Representative flow cytometry of CCR6/CCR2 and V $\gamma$ 4 expression by conventional (V $\gamma$ 4<sup>+</sup>) and CD3<sup>bright</sup> (V $\gamma$ 6<sup>+</sup>)  $\gamma\delta$ T17 cells from sLNs of naïve *Il17a*<sup>Cre</sup> $\times$ *Rosa26*<sup>eYFP</sup> mice (n=3). Mean $\pm$ SD. **b-c)** Representative of two experiments.

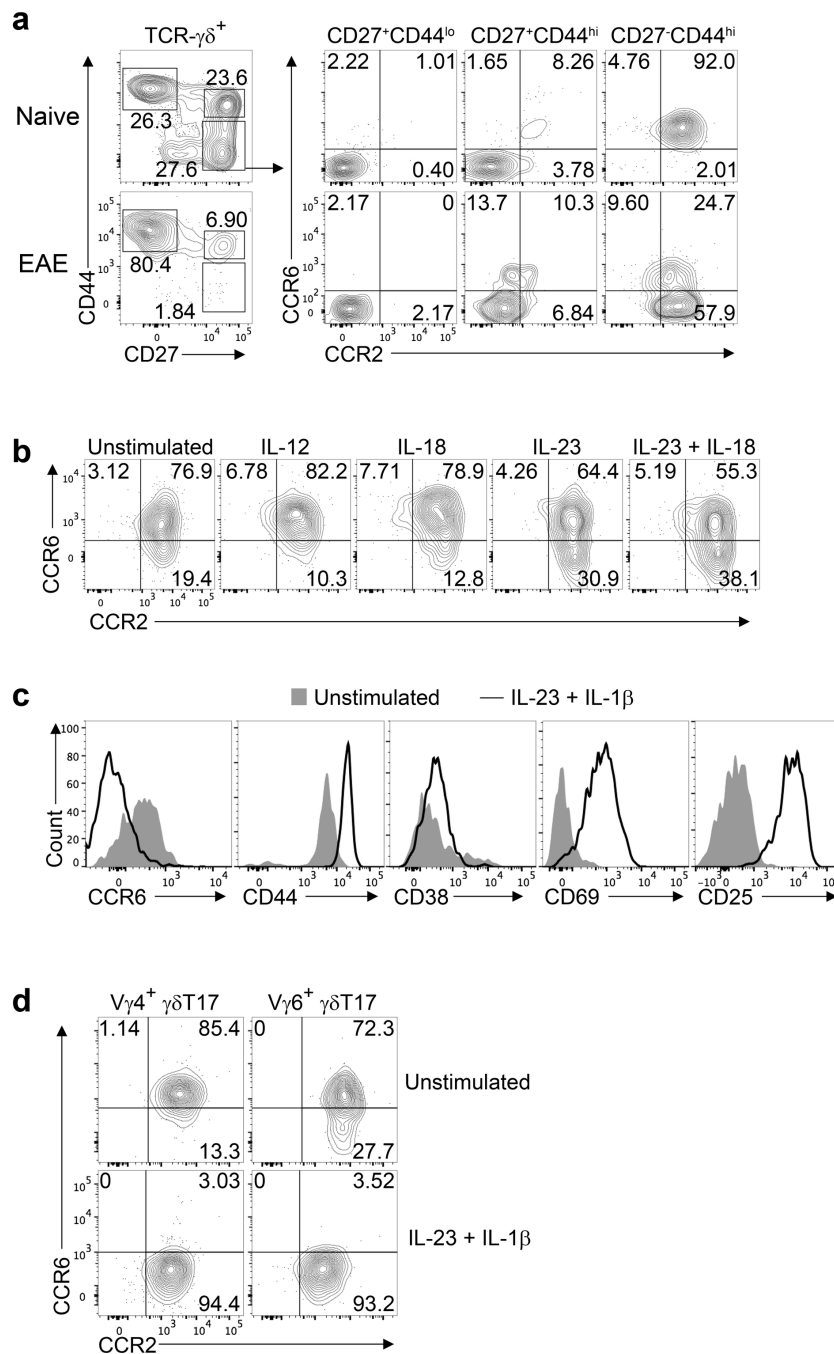

**Supplementary Figure 2: Downregulation of CCR6 in activated  $\gamma\delta$ T17 cells.** **a)** Representative flow cytometry of CCR6/CCR2 expression by subsets of  $\gamma\delta$  T cells distinguished by CD44 and CD27 expression in skin-draining lymph nodes of wildtype (WT) mice either naïve or at experimental autoimmune encephalomyelitis (EAE) onset (n=3/group). **b)** Representative flow cytometry of CCR6/CCR2 expression by  $\gamma\delta$ T17 cells from *Il17a<sup>Cre</sup> × Rosa26<sup>eYFP</sup>* lymphocytes cultured with indicated stimuli for 72 hr (n=3). **c)** Representative flow cytometry of activation marker expression by  $\gamma\delta$ T17 cells from *Il17a<sup>Cre</sup> × Rosa26<sup>eYFP</sup>* lymphocytes either unstimulated or IL-23/IL-1 $\beta$  stimulated for 72 hr (n=3). **d)** Representative flow cytometry of CCR6/CCR2 expression by splenic conventional (V $\gamma$ 4<sup>+</sup>) and CD3<sup>bright</sup> (V $\gamma$ 6<sup>+</sup>)  $\gamma\delta$ T17 cells (gated as in Supplementary Figure 1c) from *Il17a<sup>Cre</sup> × Rosa26<sup>eYFP</sup>* mice either unstimulated or IL-23/IL-1 $\beta$  stimulated for 72 hr (n=3). **a, d)** Representative of two experiments.

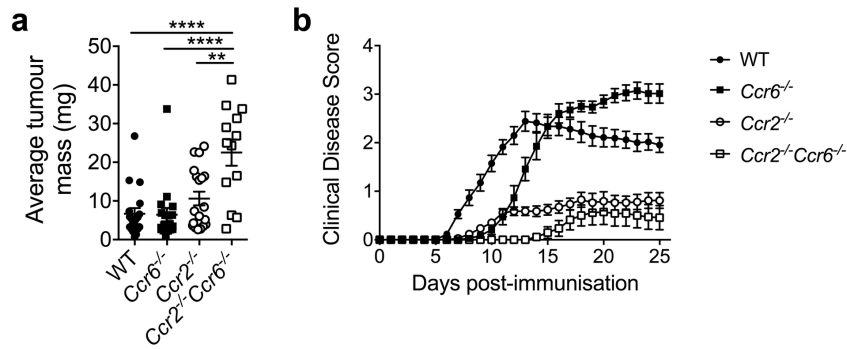

**Supplementary Figure 3: B16 melanoma and EAE progression in chemokine receptor-deficient mice. a)** Average mass (per mouse) of B16 melanomas 7d post-challenge in wildtype (WT) (n=19), *Ccr6*<sup>-/-</sup> (n=18), *Ccr2*<sup>-/-</sup> (n=19) and *Ccr2*<sup>-/-</sup>*Ccr6*<sup>-/-</sup> mice (n=13). **b)** Clinical disease scores of WT, *Ccr6*<sup>-/-</sup>, *Ccr2*<sup>-/-</sup> and *Ccr2*<sup>-/-</sup>*Ccr6*<sup>-/-</sup> mice given experimental autoimmune encephalomyelitis (EAE) (n=17/group). Mean±SEM. **a-b)** Pooled from two experiments. **a)** One-way ANOVA with Bonferroni's multiple comparisons test. \*\* p < 0.01, \*\*\*\* p < 0.0001.

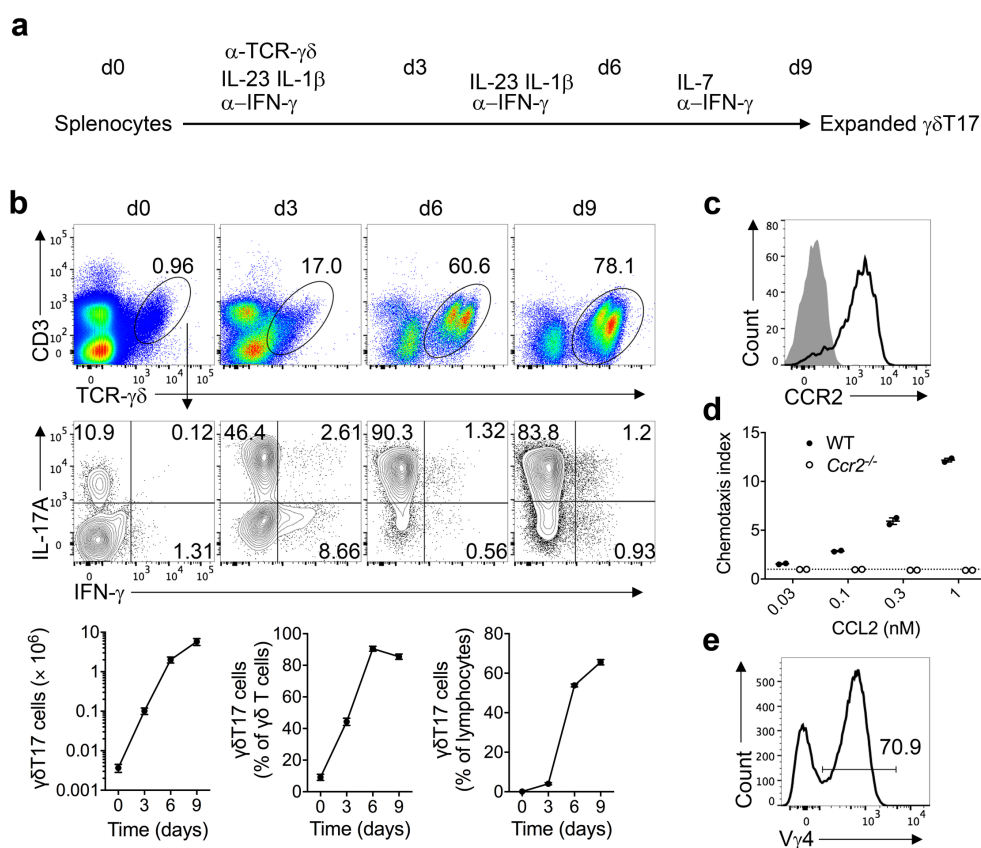

**Supplementary Figure 4: *In vitro* expansion of  $\gamma\delta$ T17 cells.** **a)** Schematic of culture protocol. **b)** Representative flow cytometry and number and frequency of *in vitro*-expanded  $\gamma\delta$ T17 cells at different stages of culture (n=3). **c)** Flow cytometry of CCR2 expression by *in vitro*-expanded  $\gamma\delta$ T17 cells relative to isotype (grey). **d)** Transwell chemotaxis of *in vitro*-expanded  $\gamma\delta$ T17 cells from wildtype (WT) and *Ccr2*<sup>-/-</sup> mice to CCL2. **e)** Flow cytometry of V $\gamma$ 4 expression by *in vitro*-expanded  $\gamma\delta$ T17 cells. **b)** Mean $\pm$ SEM, **d)** Mean $\pm$ SD. **a-e)** Representative of two experiments.



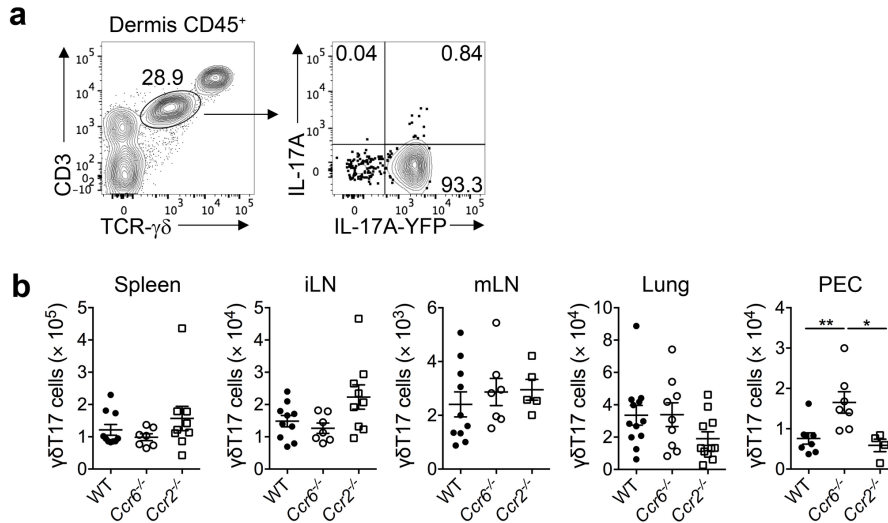

**Supplementary Figure 5: CCR6 regulates homeostatic  $\gamma\delta$ T17 cell positioning in the dermis. a)** Representative flow cytometry of IL-17A-YFP and IL-17A expression by dermal  $\gamma\delta$ T<sup>10</sup> cells from ears of *Il17a*<sup>Cre</sup>*xRosa26*<sup>eYFP</sup> mice (n=3). **b)** Number of  $\gamma\delta$ T17 cells in organs of unimmunized wildtype (WT), *Ccr6*<sup>-/-</sup> and *Ccr2*<sup>-/-</sup> mice (n=4-12/group). iLN: inguinal lymph node; mLN: mesenteric lymph node; PEC: peritoneal exudate cells. Mean $\pm$ SEM. **a)** Representative of two experiments, **b)** pooled from two experiments. **b)** One-way ANOVA with Bonferroni's multiple comparisons test. \* p < 0.05, \*\* p < 0.01.

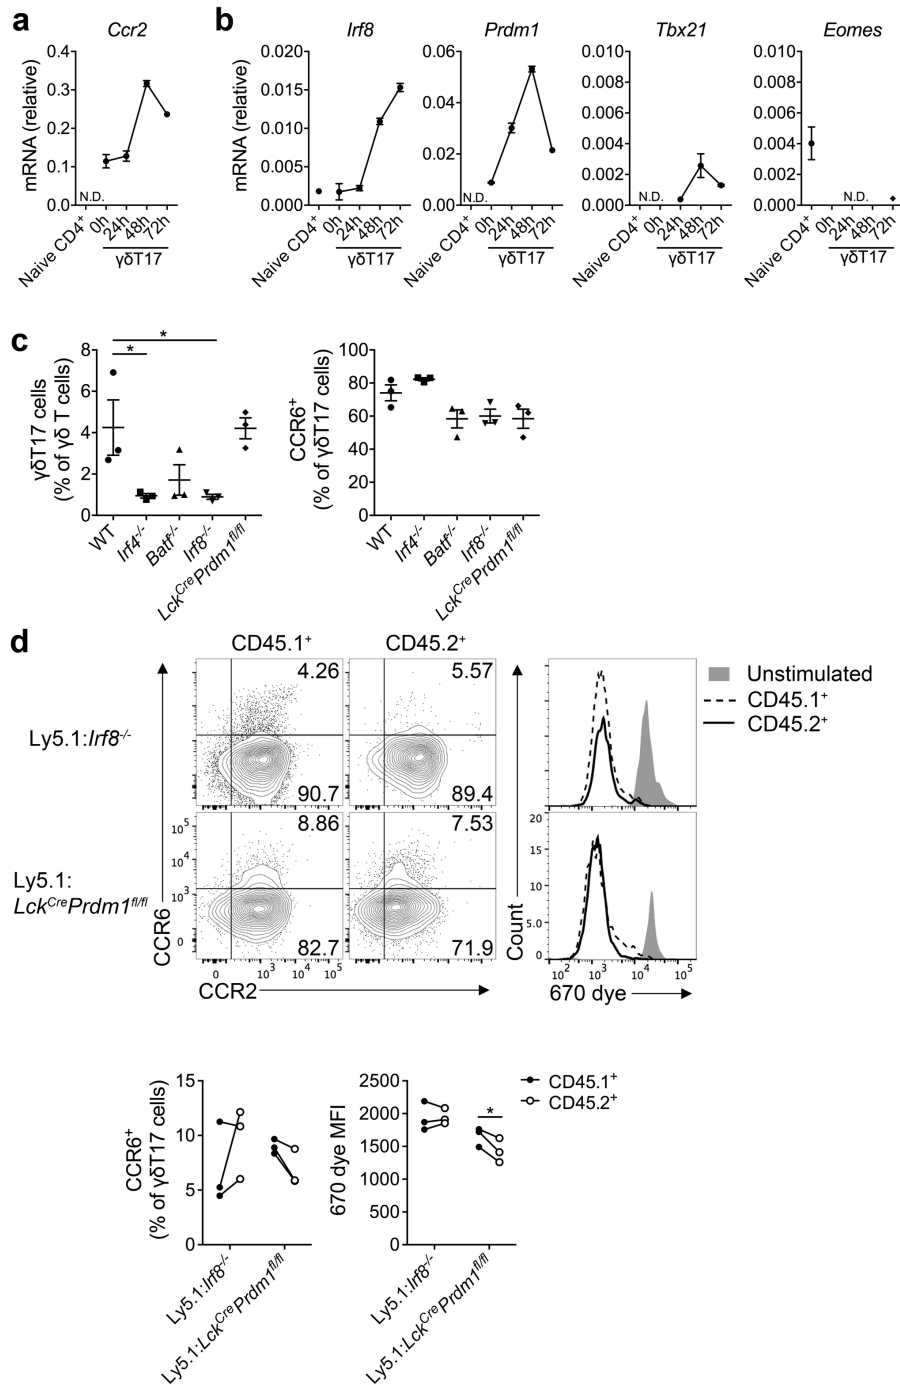

**Supplementary Figure 6: IRF8 and Blimp1 do not regulate CCR6 expression in  $\gamma\delta$ T17 cells. a)** *Ccr2* and **b)** transcription factor mRNA in sorted  $\gamma\delta$ T17 cells from *Il17a*<sup>Cre</sup>*xRosa26*<sup>eYFP</sup> lymphocytes fresh *ex vivo* or cultured with IL-23/IL-1 $\beta$  for indicated times (pooled from 5-7 mice). N.D.: not detected. **c)** Frequency of total and CCR6<sup>+</sup>  $\gamma\delta$ T17 cells in spleens of wildtype (WT) and transcription factor-deficient mice (n=3/group). **d)** Splenocytes from *Ly5.1; Irf8*<sup>-/-</sup> or *Lck*<sup>Cre</sup>*Prdm1*<sup>fl/fl</sup> mice were 670 dye-labelled, mixed 50:50 and stimulated with IL-23/IL-1 $\beta$  for 72 hr. Representative flow cytometry and quantitation of CCR6 expression and proliferation in CD45.1<sup>+</sup> or CD45.2<sup>+</sup>  $\gamma\delta$ T17 cells (n=3/group). **a-b)** Mean $\pm$ SD, **c)** Mean $\pm$ SEM. **a-b, d)** Representative of two similar experiments. **c)** One-way ANOVA with Dunnett's multiple comparisons test relative to WT control, **d)** paired two-tailed Student's *t*-test. \* *p* < 0.05.

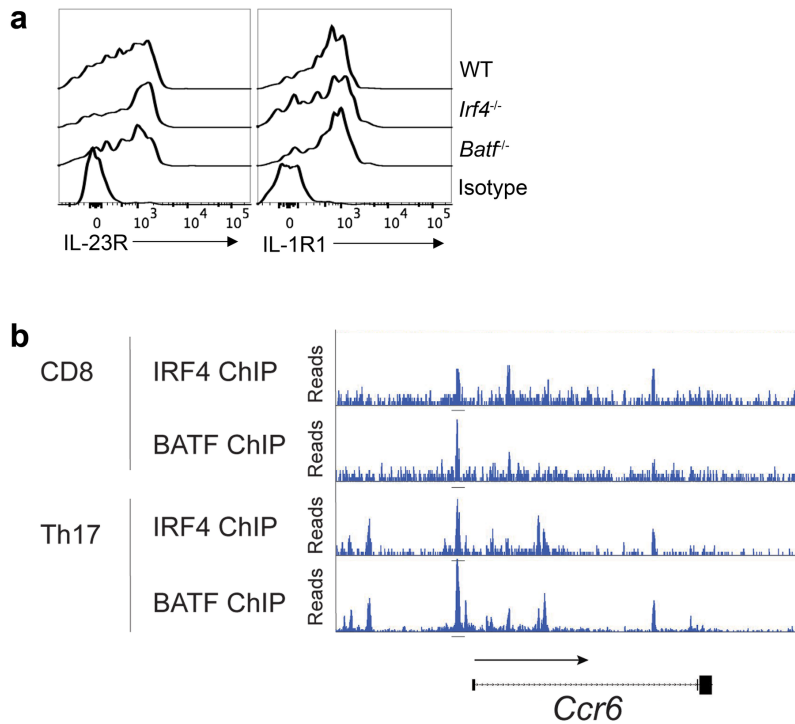

**Supplementary Figure 7: IRF4 and BATF promote CCR6 downregulation in  $\gamma\delta$ T17 cells.** **a)** Representative flow cytometry of IL-23R and IL-1R1 expression by splenic CD44<sup>hi</sup>CD27<sup>-</sup>  $\gamma\delta$  T cells (gated as in Supplementary Figure 2a) from wildtype (WT), *Irf4*<sup>-/-</sup> and *Batf*<sup>-/-</sup> mice (n=3/group). **b)** IRF4 and BATF ChIP-Seq data at the *Ccr6* locus from CD8<sup>+</sup> T cells and T helper 17 (Th17) cells from published datasets. Line indicates binding site consistently detected for both transcription factors in both cell types. Datasets are from Kurachi *et al.* 2014 (BATF CD8<sup>+</sup> T cells), Man *et al.* 2013 (IRF4 CD8<sup>+</sup> T cells) and Ciofani *et al.* 2012 (IRF4/BATF Th17 cells) as referenced in results section.

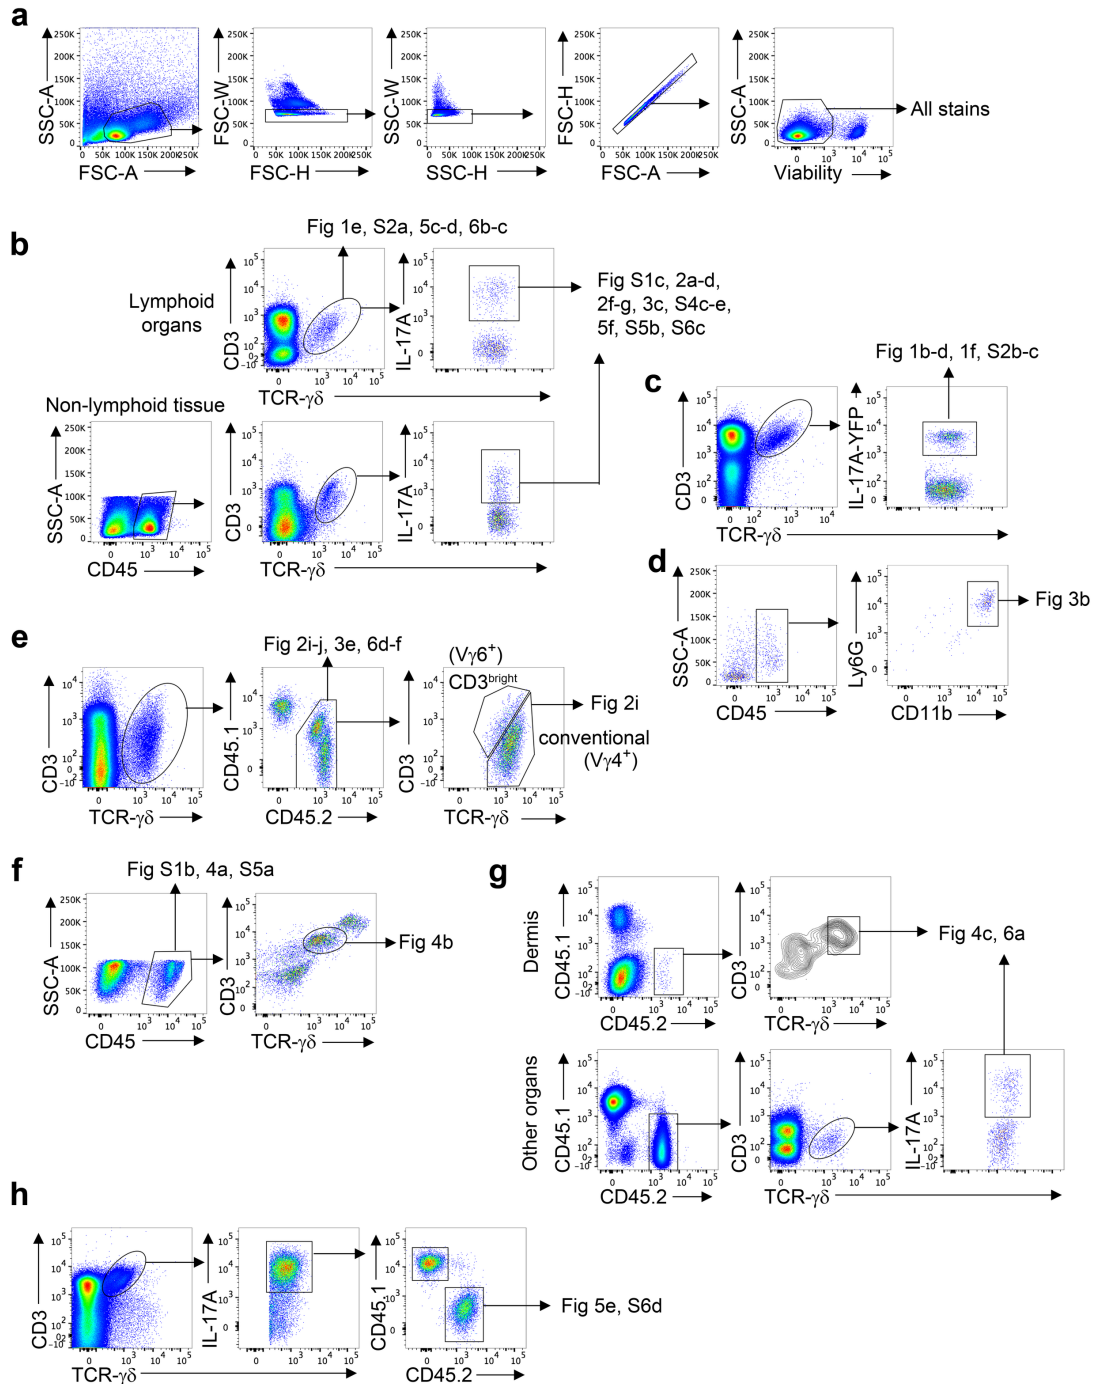

**Supplementary Figure 8: Flow cytometry gating strategies.** Each panel denotes pre-gates to flow cytometry plots and/or data points in indicated figures. **a)** Lymphocyte gating, single cell discrimination and viability gating serves as pre-gate for all flow cytometry data and sorting strategies. **b)** Gating of  $\gamma\delta$ T17 cells by IL-17A protein expression. **c)** Gating of  $\gamma\delta$ T17 cells in *Ill7a<sup>Cre</sup> × Rosa26<sup>eYFP</sup>* mice. **d)** Gating of neutrophils from nasal wash. **e)** Gating of donor CD45.1<sup>+</sup>/CD45.2<sup>+</sup> *in vitro*-expanded  $\gamma\delta$ T17 cells in co-transfer trafficking experiments, including V $\gamma$ 4/V $\gamma$ 6 distinction by CD3<sup>bright</sup> staining. **f)** Gating of dermal  $\gamma\delta$ T<sup>10</sup> cells. **g)** Gating of donor CD45.2<sup>+</sup>  $\gamma\delta$ T<sup>10</sup>/ $\gamma\delta$ T17 cells in skin-homing transfer experiments. **h)** Gating of CD45.1<sup>+</sup> and CD45.2<sup>+</sup>  $\gamma\delta$ T17 cells in co-culture experiments.

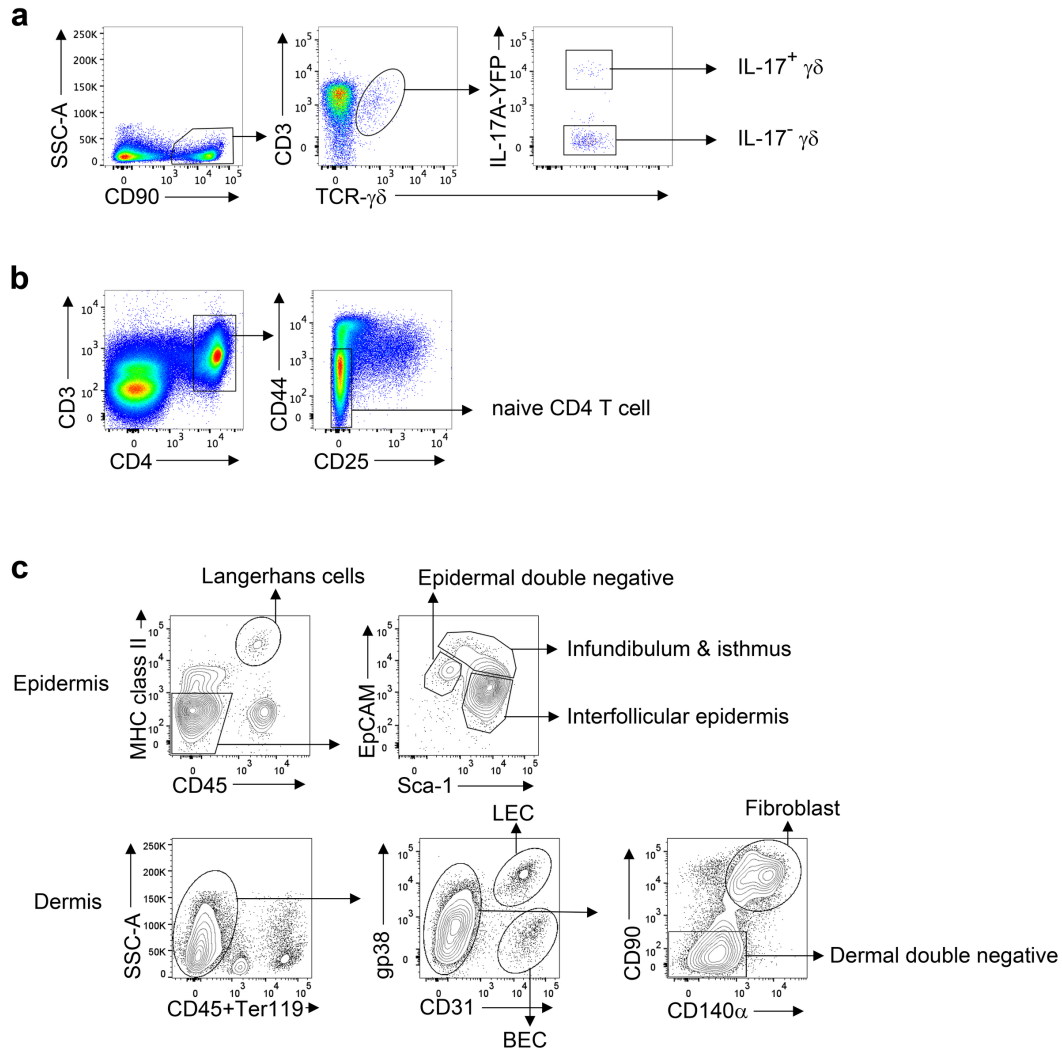

**Supplementary Figure 9: Flow sorting strategies.** **a)** Sorting of  $\gamma\delta$ T17 cells and IL-17 $^+$   $\gamma\delta$  T cells from pooled splenocytes and lymph node cells from *Il17a<sup>Cre</sup> × Rosa26<sup>eYFP</sup>* mice. **b)** Sorting of naïve CD4 $^+$  T cells from wildtype (WT) splenocytes. **c)** Sorting of indicated epidermal keratinocyte and dermal stromal populations from skin of WT mice. All strategies first gated on live single cells as in Supplementary Figure 8a.

**Supplementary Table 1: Monoclonal antibodies and related reagents**

| <b>Primary antibodies for flow cytometry, ELISA and cell culture</b> |                                                     |                  |             |                      |
|----------------------------------------------------------------------|-----------------------------------------------------|------------------|-------------|----------------------|
| Antigen                                                              | Conjugate                                           | Clone            | Company     | Final concentration  |
| BrdU                                                                 | FITC                                                | B44              | BD          | 15µL/well            |
| CCL2                                                                 | Biotin (ELISA)<br>Purified (ELISA)                  | Polyclonal       | R&D<br>R&D  | 200ng/ml<br>200ng/ml |
| CCR2                                                                 | Purified                                            | MC21             | In house    | 5.6µg/ml             |
| CCR6                                                                 | Purified<br>PE                                      | MAB590<br>140706 | R&D<br>R&D  | 8.3µg/ml<br>7µL/well |
| CD3ε                                                                 | Biotin<br>BV510<br>FITC<br>PECy7                    | 17A2             | eBioscience | 2µg/ml               |
|                                                                      |                                                     | 145-2C11         | BD          | 0.833µg/ml           |
|                                                                      |                                                     |                  | BD          | 2µg/ml               |
|                                                                      |                                                     |                  | eBioscience | 2µg/ml               |
| CD4                                                                  | Alexa 647                                           | RM4-5            | BD          | 0.67µg/ml            |
| CD11b                                                                | PECy7                                               | M1/70            | BD          | 0.67µg/ml            |
| CD25                                                                 | Biotin<br>PE                                        | 7D4              | BD          | 4.17µg/ml            |
|                                                                      |                                                     |                  |             | 0.83µg/ml            |
| CD27                                                                 | PECy7                                               | LG.3A10          | Biolegend   | 0.67µg/ml            |
| CD31                                                                 | FITC                                                | MEC 13.3         | BD          | 4.17µg/ml            |
| CD38                                                                 | APC                                                 | 90               | eBioscience | 0.83µg/ml            |
| CD44                                                                 | Biotin<br>FITC<br>V450                              | IM7              | BD          | 1.67µg/ml            |
|                                                                      |                                                     |                  | BD          | 0.67µg/ml            |
|                                                                      |                                                     |                  | BD          | 1.67µg/ml            |
| CD45                                                                 | APC<br>FITC<br>PE                                   | 30-F11           | BD          | 0.67µg/ml            |
|                                                                      |                                                     |                  | BD          | 1.67µg/ml            |
|                                                                      |                                                     |                  | BD          | 0.83µg/ml            |
| CD45.1                                                               | APC<br>Biotin<br>PerCPCy5.5                         | A20              | eBioscience | 0.67µg/ml            |
|                                                                      |                                                     |                  | Biolegend   | 1.67µg/ml            |
|                                                                      |                                                     |                  | eBioscience | 1.67µg/ml            |
| CD45.2                                                               | Biotin<br>FITC<br>PE<br>PECy7<br>PerCPCy5.5         | 104              | BD          | 1.67µg/ml            |
|                                                                      |                                                     |                  | BD          | 1.67µg/ml            |
|                                                                      |                                                     |                  | BD          | 0.67µg/ml            |
|                                                                      |                                                     |                  | Biolegend   | 0.83µg/ml            |
|                                                                      |                                                     |                  | eBioscience | 1.67µg/ml            |
| CD69                                                                 | PECy7                                               | HI.2F3           | BD          | 0.83µg/ml            |
| CD90.2                                                               | APC                                                 | 53-2.1           | BD          | 0.56µg/ml            |
| CD121α (IL-1R1)                                                      | PE                                                  | JAMA-147         | Biolegend   | 3.33µg/ml            |
| CD140α                                                               | BV421                                               | APA5             | BD          | 1.11µg/ml            |
| Ep-CAM                                                               | Purified                                            | G8.8             | BD          | 2.08µg/ml            |
| gp38                                                                 | Biotin                                              | eBio8.1.1        | eBioscience | 2.78µg/ml            |
| I-A/I-E                                                              | Biotin                                              | 2G9              | BD          | 2.08µg/ml            |
| IFN-γ                                                                | Purified (cell culture)<br>FITC                     | XMG1.2           | BioXCell    | 10µg/ml              |
|                                                                      |                                                     |                  | BD          | 2.78µg/ml            |
| IL-17A                                                               | BV421<br>BV510<br>PE                                | TC11-<br>18H10.1 | Biolegend   | 0.28µg/ml            |
|                                                                      |                                                     |                  | Biolegend   | 1.33µg/ml            |
|                                                                      |                                                     |                  | BD          | 1.11µg/ml            |
| IL-23R                                                               | APC                                                 | 753317           | R&D         | 20µL/well            |
| Ly6G                                                                 | FITC                                                | 1A8              | BD          | 1.67µg/ml            |
| RORγt                                                                | PerCPeFluor710                                      | B2D              | eBioscience | 1.67µg/ml            |
| Sca-1                                                                | FITC                                                | D7               | eBioscience | 2.08µg/ml            |
| TCR-γδ                                                               | Biotin<br>BV421<br>PECy7<br>Purified (cell culture) | GL3              | eBioscience | 1.67µg/ml            |
|                                                                      |                                                     |                  | Biolegend   | 0.83µg/ml            |
|                                                                      |                                                     |                  | Biolegend   | 0.83µg/ml            |
|                                                                      |                                                     |                  | Biolegend   | 1µg/ml               |
| Vγ4                                                                  | PECy7                                               | UC3-10A6         | eBioscience | 0.67µg/ml            |

| <b>Supplementary Table 1 (continued)</b> |               |            |                   |                 |
|------------------------------------------|---------------|------------|-------------------|-----------------|
| <b>Other flow cytometry reagents</b>     |               |            |                   |                 |
| Reagent                                  | Conjugate     | Clone      | Company           | Final dilution  |
| $\alpha$ -rat IgG                        | Alexa 647     | Polyclonal | Life Technologies | 10 $\mu$ g/ml   |
| Proliferation dye                        | eFluor670     | -          | eBioscience       | 5 $\mu$ M       |
| Live/Dead fixable dye                    | Near infrared | -          | Life Technologies | 1/1000          |
| Streptavidin                             | Alexa 647     | -          | Jackson           | 2.5 $\mu$ g/ml  |
|                                          | BV510         |            | ImmunoResearch    | 0.33 $\mu$ g/ml |
|                                          | PerCPy5.5     |            | BD                | 0.67 $\mu$ g/ml |

**Supplementary Table 2: Primers used in qPCR**

| Gene         | Forward primer (5'→3')          | Reverse primer (5'→3')          |
|--------------|---------------------------------|---------------------------------|
| <i>Rplp0</i> | TGC AGA TCG GGT ACC CAA CT      | ACG CGC TTG TAC CCA TTG A       |
| <i>Ccr2</i>  | GTT CAT CCA CGG CAT ACT ATC AAC | GCC CCT TCA TCA AGC TCT TG      |
| <i>Ccr6</i>  | CCT GGG CAA CAT TAT GGT GGT     | CAG AAC GGT AGG GTG AGG ACA     |
| <i>Rorc</i>  | CAG CCA ACA TGT GGA AAA GCT     | GGG AAG GCG GCT TGG A           |
| <i>Irf4</i>  | CGG GCA AGC AGG ACT ACA AT      | ACA ATG CCC AAG CCT TGA TG      |
| <i>Irf8</i>  | GCT GAT CTG GGA AAA TGA TGA GA  | CAC CTC CTG ATT GTA ATC CTG CTT |
| <i>Prdm1</i> | TGG CAG AGA CTG GGA TCA TG      | CTC GGC CTC TGT CCA CAA A       |
| <i>Batf</i>  | GTT CTG TTT CTC CAG GTC C       | GAA GAA TCG CAT CGC TGC         |
| <i>Tbx21</i> | GCC AGG GAA CCG CTT ATA TG      | AAC TTC CTG GCG CAT CCA         |
| <i>Eomes</i> | TGA GCT TCA ACA TAA ACG GAC TCA | CGG CCA GAA CCA CTT CCA         |
